# Supplementary material for: Nucleation and growth kinetics estimation for l-phenylalanine hydrate and anhydrate crystallization
Source: Royal Society of Chemistry journal article supplement (doi:10.1039/c0ce00585a), 2011-01-01
Supplement: c0ce00585a.pdf [file c0ce00585a.pdf]

### Supplemental Information for “Nucleation and Growth Kinetics Estimation for L-Phenylalanine Hydrate and Anhydrate Crystallization”

Nicholas C. S. Kee, Paul D. Arendt, Li May Goh, Reginald B. H. Tan, and Richard D. Braatz

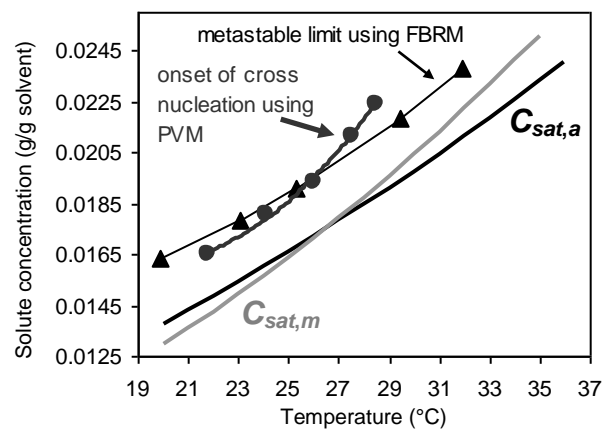

Figure S1. L-phe solubility and metastable limits.

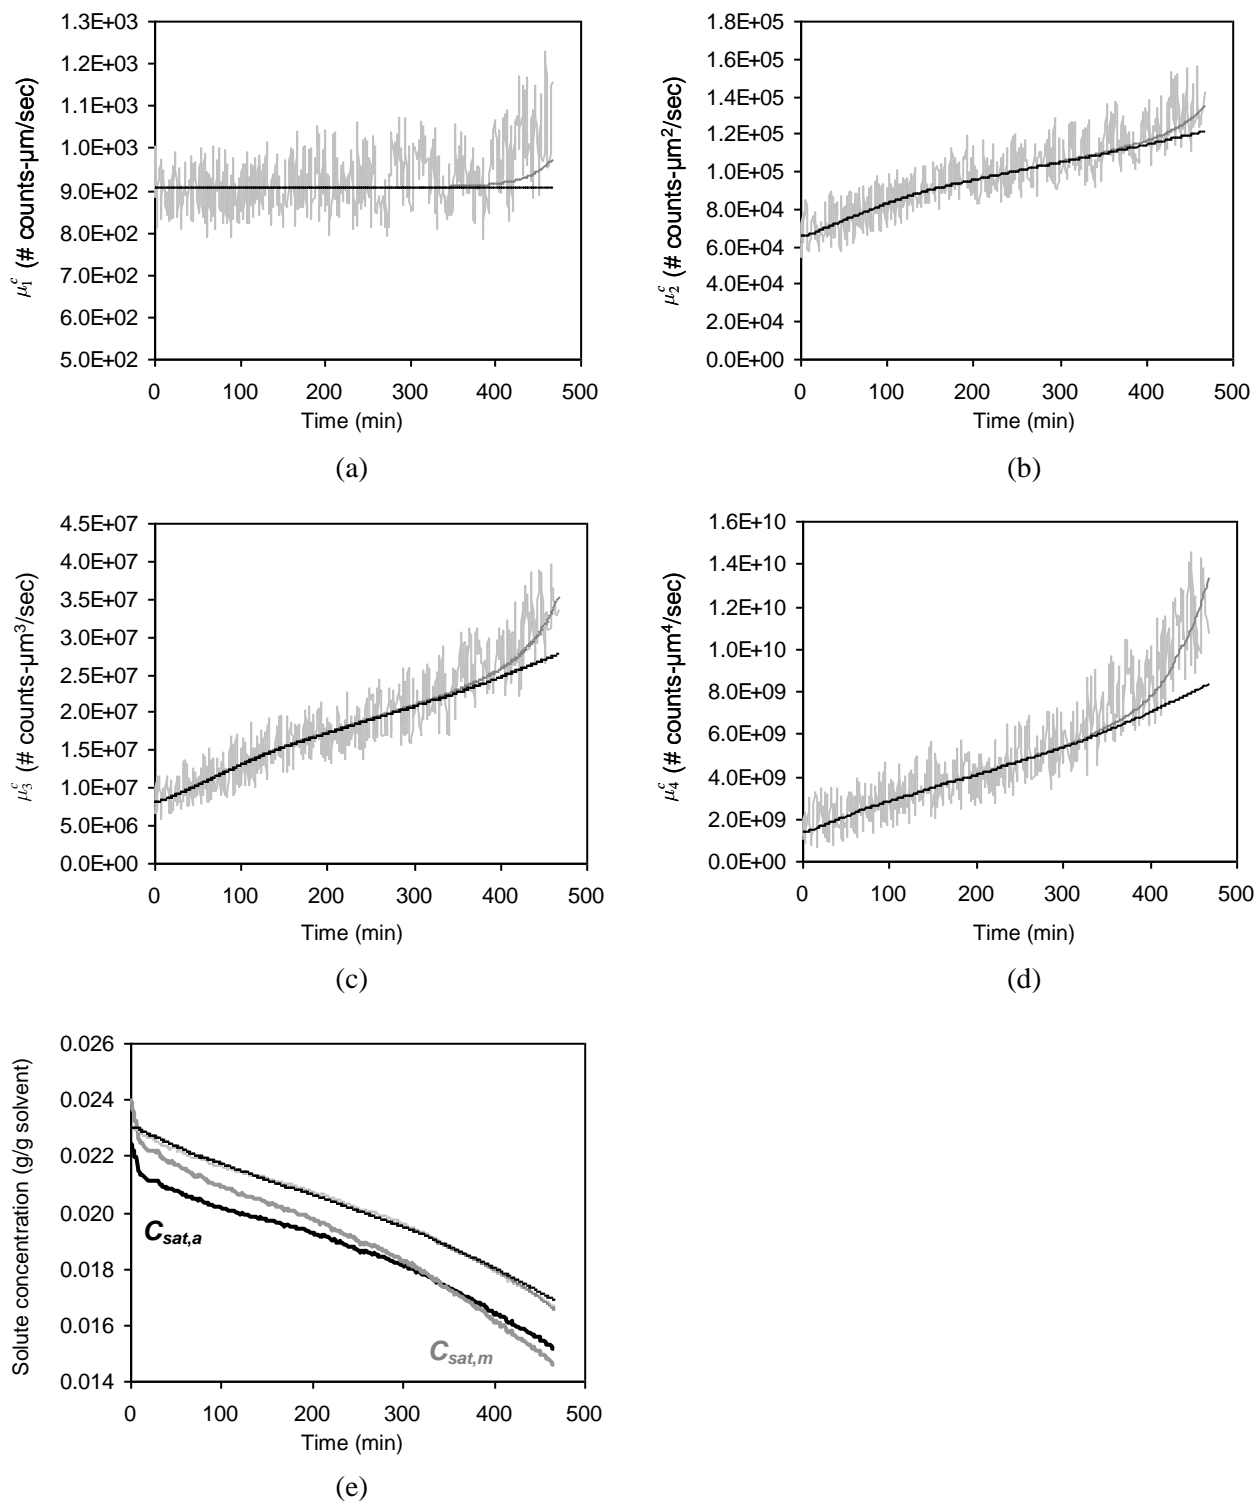

**Figure S2.** Run 2 moments and solute concentration, experimental (-); Stage 1 model (-); Stage 3 model (-):  
(a)  $\mu_1^c$ , (b)  $\mu_2^c$ , (c)  $\mu_3^c$ , (d)  $\mu_4^c$ , (e)  $C$ . The solubility of each crystal form computed from the measured temperature is shown as thick grey and black lines in (e).

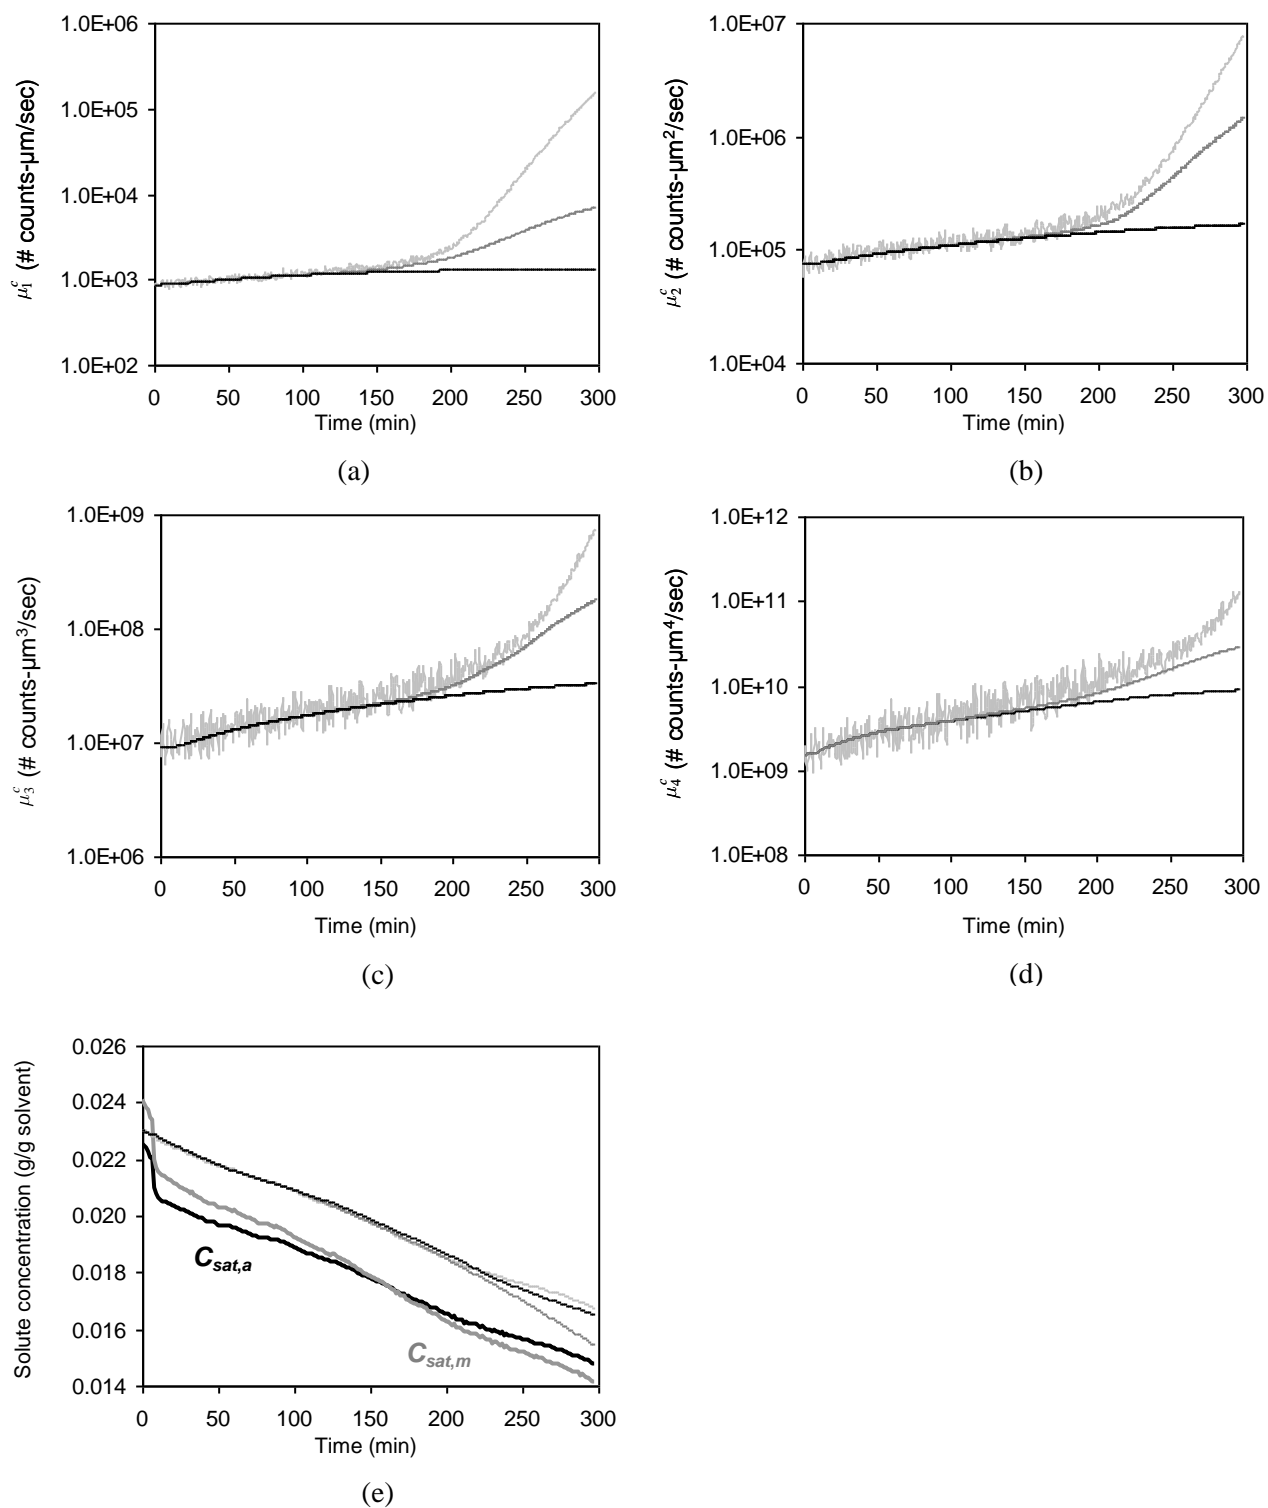

**Figure S3.** Run 1 moments and solute concentration, experimental (-); Stage 1 and 2 models (-); Stage 3 model (-): (a)  $\mu_1^c$ , (b)  $\mu_2^c$ , (c)  $\mu_3^c$ , (d)  $\mu_4^c$ , (e)  $C$ . The solubility of each crystal form computed from the measured temperature is shown as thick grey and black lines in (e).

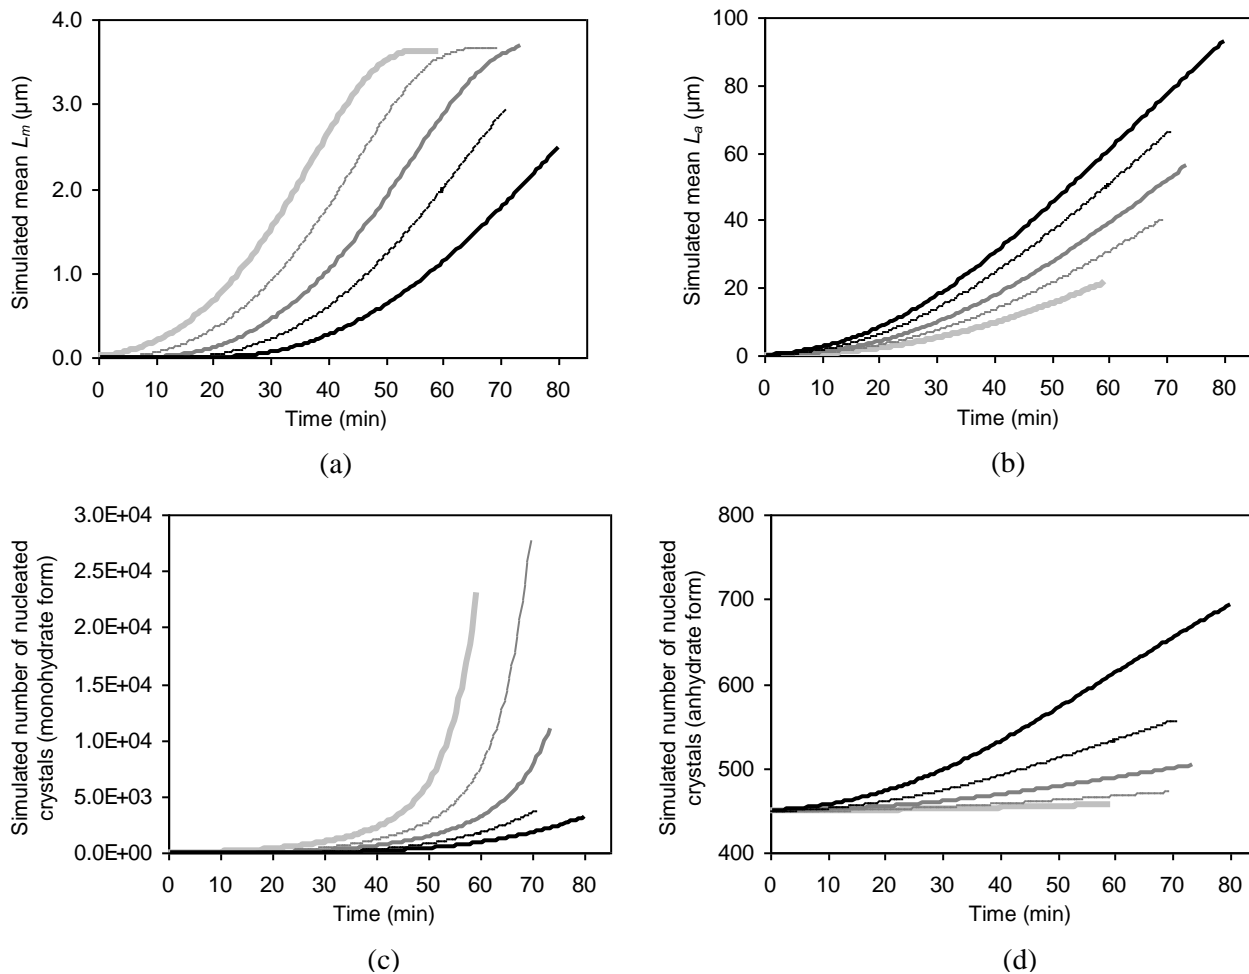

**Figure S4.** Simulated profiles for Run 1m (-), 2m (-), 3m (-), 4m (-), and 5m (-): (a) mean  $L_m$  ( $\mu\text{m}$ ), (b) mean  $L_a$  ( $\mu\text{m}$ ), (c) number of nucleated crystals (monohydrate form), and (d) number of nucleated crystals (anhydrate form).

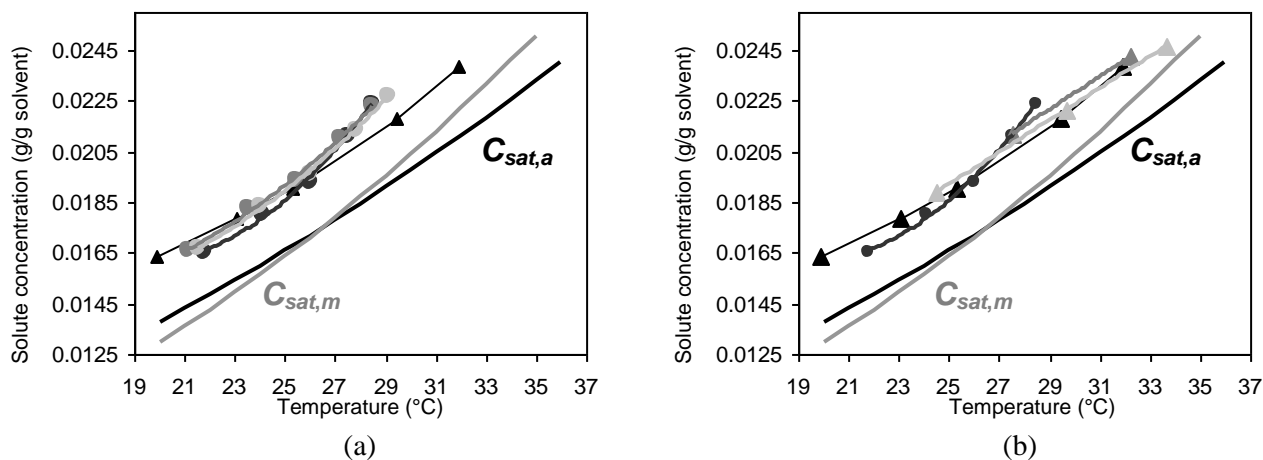

**Figure S5.** Comparison of experimental metastable limits by FBRM ( $\blacktriangle$ ) and PVM ( $\bullet$ ) to simulated results: (a) at mean  $L_m$  2.0  $\mu\text{m}$  ( $\bullet$ ) and 2.5  $\mu\text{m}$  ( $\bullet$ ), (b) at 10% ( $\blacktriangle$ ) and 20% ( $\blacktriangle$ ) increase in the number of nucleated anhydrate crystals.
